# Supplementary material for: Vapor phase coupling of n-butanol over the mixed catalyst system PdZn/SiO2 + TiO2
Source: Royal Society of Chemistry journal article supplement (doi:10.1039/d4re00474d), 2025-01-01
Supplement: d4re00474d1.pdf [file d4re00474d1.pdf]

**Supplementary Information**

**Vapor phase coupling of n-butanol over the mixed catalyst system PdZn/SiO<sub>2</sub>+TiO<sub>2</sub>**

Evan C. Wegener\*

USDA, Agricultural Research Service,  
National Center for Agricultural Utilization Research  
Renewable Product Technology  
1815 N. University St. Peoria, IL 61604 USA

Corresponding author. Email: [evan.wegener@usda.gov](mailto:evan.wegener@usda.gov)

Table S1: Conversions and product selectivities from n-butanol coupling reactions over mixtures of TiO<sub>2</sub> and PdZn/SiO<sub>2</sub>

| TiO <sub>2</sub> :PdZn/SiO <sub>2</sub> | 0.5     |         |         | 1       |         |          | 2       |         |          |
|-----------------------------------------|---------|---------|---------|---------|---------|----------|---------|---------|----------|
|                                         | 2.3     | 4.7     | 9.4     | 2.3     | 4.7     | 9.4      | 2.3     | 4.7     | 9.4      |
| <b>Contact Time (min)</b>               |         |         |         |         |         |          |         |         |          |
| <b>Conversion (%)</b>                   | 51 ± 3  | 64 ± 3  | 76 ± 4  | 48 ± 2  | 64 ± 3  | 82 ± 4   | 41 ± 2  | 66 ± 3  | 81 ± 4   |
| <b>Selectivity (%)</b>                  |         |         |         |         |         |          |         |         |          |
| <i>Butanal</i>                          | 60 ± 6  | 33 ± 3  | 19 ± 2  | 52 ± 5  | 33 ± 3  | 14 ± 1   | 54 ± 5  | 24 ± 2  | 13 ± 1   |
| <i>C8 Oxygenates</i>                    | 30 ± 3  | 48 ± 5  | 52 ± 5  | 37 ± 4  | 50 ± 5  | 57 ± 6   | 37 ± 4  | 57 ± 6  | 59 ± 6   |
| <i>C7 Hydrocarbons</i>                  | 1 ± 0.2 | 3 ± 0.5 | 5 ± 0.8 | 2 ± 0.3 | 2 ± 0.3 | 3 ± 0.5  | 1 ± 0.2 | 2 ± 0.3 | 3 ± 0.5  |
| <i>C8 Hydrocarbons</i>                  | 3 ± 0.5 | 6 ± 0.9 | 9 ± 1.4 | 5 ± 0.8 | 6 ± 0.9 | 11 ± 1.7 | 3 ± 0.5 | 7 ± 1.1 | 11 ± 1.7 |
| <i>C12 Hydrocarbons</i>                 | 2 ± 0.3 | 3 ± 0.5 | 8 ± 1.2 | 2 ± 0.3 | 4 ± 0.6 | 11 ± 1.7 | 2 ± 0.3 | 6 ± 0.9 | 11 ± 1.7 |
| <i>Dehydration</i>                      | 1 ± 0.2 | 2 ± 0.3 | 2 ± 0.3 | 1 ± 0.2 | 1 ± 0.2 | 1 ± 0.2  | 1 ± 0.2 | 1 ± 0.2 | 2 ± 0.3  |
| <i>Others</i>                           | 3 ± 0.5 | 5 ± 0.8 | 5 ± 0.8 | 1 ± 0.2 | 3 ± 0.5 | 3 ± 0.5  | 2 ± 0.3 | 3 ± 0.5 | 1 ± 0.2  |

Table S2: Summary of reactions performed using individual catalysts and different feeds

| Catalyst              | Reactant                  | Conversion (%) | Products (Selectivity)                                                                       |
|-----------------------|---------------------------|----------------|----------------------------------------------------------------------------------------------|
| TiO <sub>2</sub>      | n-Butanol                 | 0.5            | Butenes                                                                                      |
| TiO <sub>2</sub>      | Butanal                   | 53             | 2-Ethylhexenal                                                                               |
| TiO <sub>2</sub>      | 80% n-Butanol/20% Butanal | 10*            | 2-Ethylhexenal (55%)<br>2-Ethylhexanal (25%)<br>2-Ethylhexanol (20%)                         |
| PdZn/SiO <sub>2</sub> | 2-Ethylhexanol            | 60             | 2-Ethylhexanal (97%)<br>C <sub>7</sub> Hydrocarbons (1%)<br>C <sub>8</sub> Hydrocarbons (2%) |
| TiO <sub>2</sub>      | 2-Ethylhexanol            | 20             | C <sub>8</sub> Olefins                                                                       |
| K-TiO <sub>2</sub>    | n-Butanol                 | 0.3            | Butenes                                                                                      |
| W-TiO <sub>2</sub>    | n-Butanol                 | 2              | Butenes                                                                                      |

\* Total conversion of C<sub>4</sub> oxygenates in feed

Table S3: Approach to equilibrium for n-butanol dehydrogenation during coupling reactions with mixed catalysts beds

| Catalyst Mixture                             | Contact Time (min) | Approach to Equilibrium ( $\eta$ ) |
|----------------------------------------------|--------------------|------------------------------------|
| 0.5TiO <sub>2</sub> :PdZn/SiO <sub>2</sub>   | 2.3                | 1.0                                |
|                                              | 4.7                | 1.0                                |
|                                              | 9.4                | 1.0                                |
| 1.0TiO <sub>2</sub> :PdZn/SiO <sub>2</sub>   | 2.3                | 0.8                                |
|                                              | 4.7                | 1.0                                |
|                                              | 9.4                | 1.0                                |
| 2.0TiO <sub>2</sub> :PdZn/SiO <sub>2</sub>   | 2.3                | 0.6                                |
|                                              | 4.7                | 0.8                                |
|                                              | 9.4                | 0.9                                |
| 2.0K-TiO <sub>2</sub> :PdZn/SiO <sub>2</sub> | 4.7                | 1.0                                |
| 2.0W-TiO <sub>2</sub> :PdZn/SiO <sub>2</sub> | 9.4                | 0.7                                |

$$\eta = \frac{1}{K_{Dehydrogenation}} * \frac{P_{Butanal}P_{H_2}}{P_{Butanol}}$$

Where  $\eta$  is the approach to equilibrium,  $K_{Dehydrogenation}$  is the equilibrium constant for butanol dehydrogenation, and  $P_{Butanal}$ ,  $P_{H_2}$ , and  $P_{Butanol}$  are the partial pressures of butanal, hydrogen, and butanol, respectively. An  $\eta = 1.0$  indicates the dehydrogenation reaction is at equilibrium. The equilibrium constant was calculated from data available in:

D.R. Stull, E.F. Westrum, G.C. Sinke, "The Chemical Thermodynamics of Organic Compounds," John Wiley and Sons, Inc. New York, 1969

Table S4: Summary of K-TiO<sub>2</sub> catalysts synthesized by the modified liquid phase grafting procedure

| Potassium Salt                   | Solvent | Salt Concentration (mol/L) | Potassium Loading (wt%) |
|----------------------------------|---------|----------------------------|-------------------------|
| N/A                              | Water   | N/A                        | 0.02                    |
| KOH                              | Water   | 0.05                       | 1.22                    |
| KOH                              | Water   | 0.1                        | 1.54                    |
| KOH                              | Water   | 0.25                       | 2.12                    |
| KOH                              | Water   | 0.5                        | 3.10                    |
| KOH                              | Water   | 1.0                        | 5.54                    |
| KOH                              | Water   | 1.5                        | 7.85                    |
| KOH                              | Water   | 2.0                        | 10.34                   |
| K <sub>2</sub> CO <sub>3</sub>   | Water   | 0.01                       | 0.14                    |
| K <sub>2</sub> CO <sub>3</sub>   | Water   | 0.05                       | 0.50                    |
| K <sub>2</sub> CO <sub>3</sub>   | Water   | 0.1                        | 0.61                    |
| KCH <sub>3</sub> CO <sub>2</sub> | Ethanol | 0.01                       | 0.34                    |
| KCH <sub>3</sub> CO <sub>2</sub> | Ethanol | 0.05                       | 0.78                    |
| KCH <sub>3</sub> CO <sub>2</sub> | Ethanol | 0.1                        | 1.03                    |

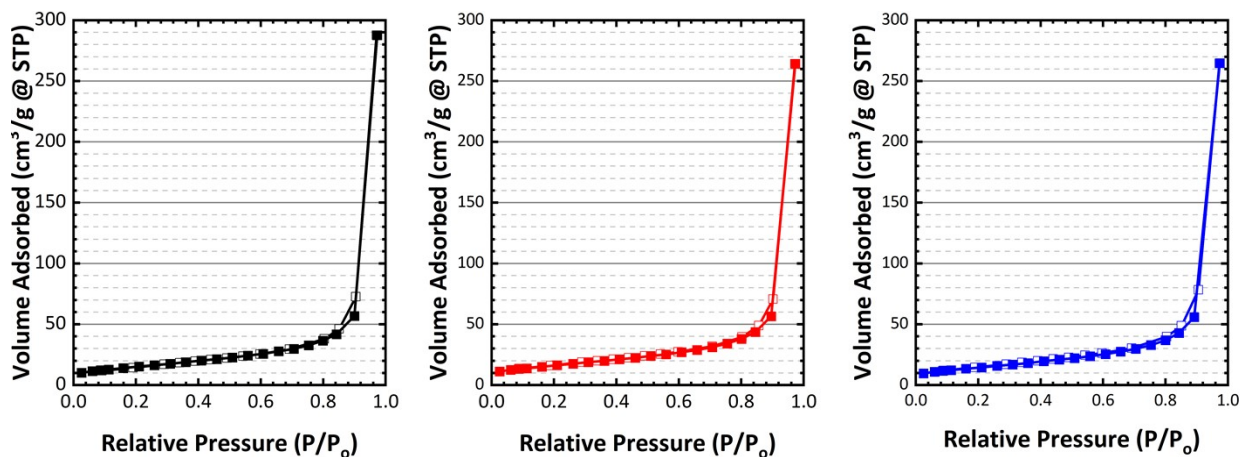

Figure S1:  $N_2$  adsorption (solid symbols) and desorption (open symbols) isotherms collected at 77K. Left panel –  $TiO_2$ , center panel –  $K-TiO_2$ , and right panel –  $W-TiO_2$ .

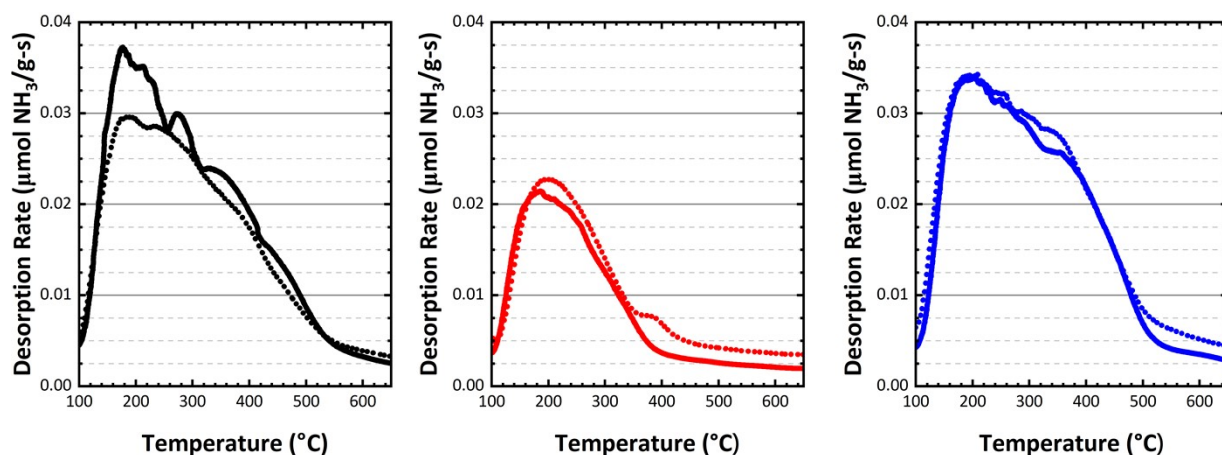

Figure S2: Normalized  $NH_3$  desorption profile measured during temperature programmed desorption of ammonia. Left panel –  $TiO_2$ , center panel –  $K-TiO_2$ , and right panel –  $W-TiO_2$ . Solid profiles – He pretreatment and Dashed profiles – 10%  $H_2/Ar$  pretreatment

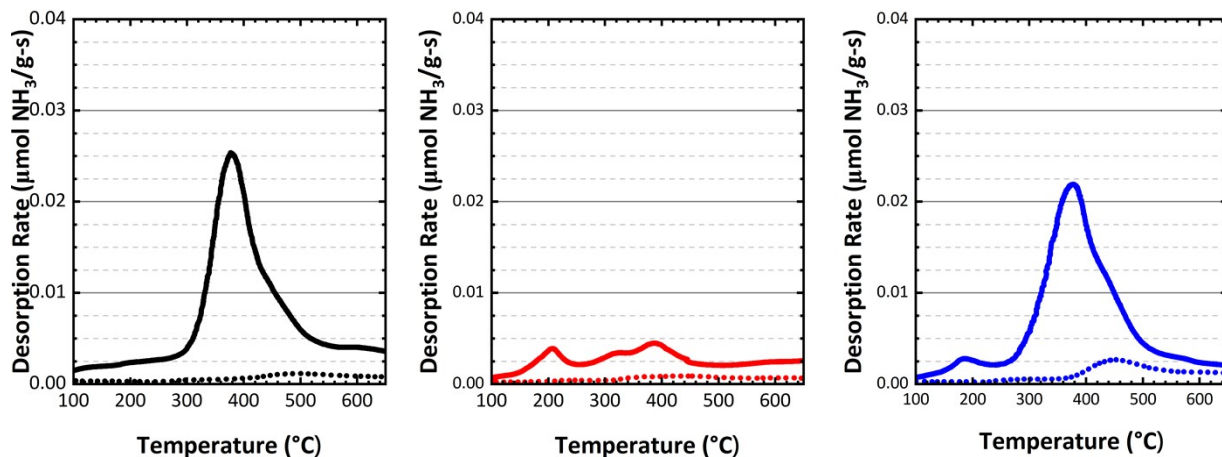

Figure S3: Normalized  $NH_3$  desorption profile measured during temperature programmed desorption of propylamine. Left panel –  $TiO_2$ , center panel –  $K-TiO_2$ , and right panel –  $W-TiO_2$ . Solid profiles – He pretreatment and Dashed profiles – 10%  $H_2/Ar$  pretreatment

Table S5: Conversions and product selectivities from *n*-butanol coupling reactions over mixtures of modified TiO<sub>2</sub> and PdZn/SiO<sub>2</sub>

| Catalyst                  | K-TiO <sub>2</sub> + PdZn/SiO <sub>2</sub> | W-TiO <sub>2</sub> + PdZn/SiO <sub>2</sub> |
|---------------------------|--------------------------------------------|--------------------------------------------|
| <b>Contact Time (min)</b> | 9.4                                        | 4.7                                        |
| <b>Conversion (%)</b>     | 66 ± 3                                     | 60 ± 3                                     |
| <b>Coupling Yield (%)</b> | 39                                         | 36                                         |
| <b>Selectivity (%)</b>    |                                            |                                            |
| <i>Butanal</i>            | 35 ± 4                                     | 28 ± 3                                     |
| <i>C8 Oxygenates</i>      | 48 ± 5                                     | 39 ± 4                                     |
| <i>C7 Hydrocarbons</i>    | 2 ± 0.3                                    | 1 ± 0.2                                    |
| <i>C8 Hydrocarbons</i>    | 6 ± 0.9                                    | 16 ± 2                                     |
| <i>C12 Hydrocarbons</i>   | 3 ± 0.5                                    | 4 ± 0.6                                    |
| <i>Dehydration</i>        | 1 ± 0.2                                    | 9 ± 1.4                                    |
| <i>Others</i>             | 4 ± 0.6                                    | 2 ± 0.3                                    |
